# Supplementary material for: Unraveling the effect of carbon morphology evolution in hard carbons on sodium storage performance
Source: Royal Society of Chemistry journal article supplement (doi:10.1039/d3qi01497e), 2023-01-01
Supplement: d3qi01497e1.pdf [file d3qi01497e1.pdf]

## *Supporting Information*

### Unraveling the effect of carbon morphology evolution in hard carbons on sodium storage performance

*Huilan Sun<sup>a</sup>, Qiaoyan Zhang<sup>a</sup>, Fei Yuan<sup>a</sup>, Di Zhang<sup>a</sup>, Zhaojin Li<sup>a</sup>, Qiujun Wang<sup>a</sup>, Huan Wang<sup>a,\*</sup>, Bo Wang<sup>a,\*</sup>*

*<sup>a</sup> Hebei Key Laboratory of Flexible Functionals Materials, School of Materials Science and Engineering, Hebei University of Science and Technology, Shijiazhuang 050000, PR China.*

*Email: wangbo1996@gmail.com (B. Wang), wanghuantp@163.com (H. Wang)*

*\* Corresponding author.*

## Supporting Information

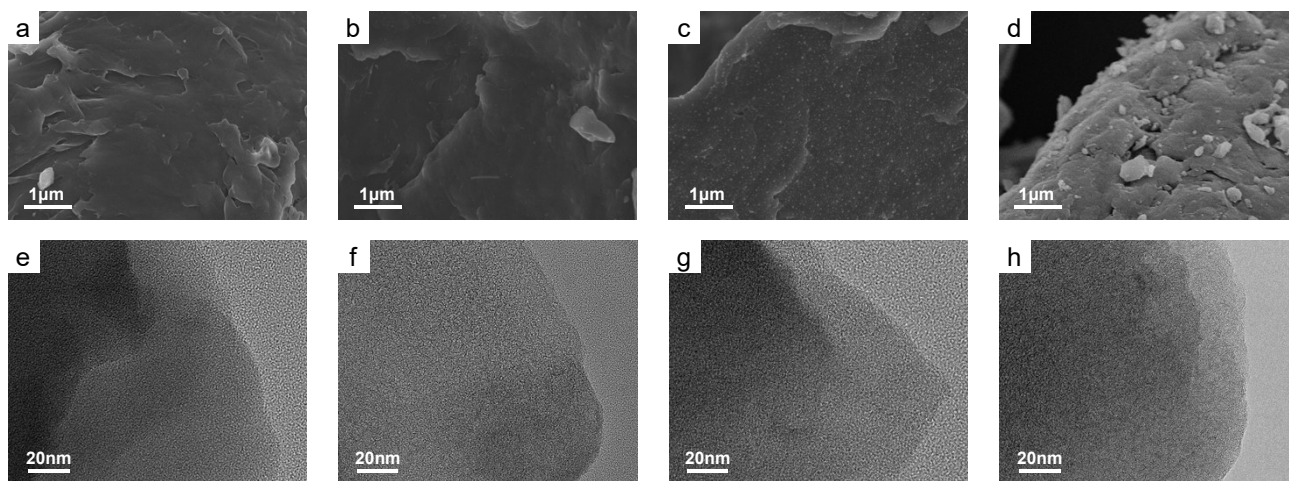

**Fig. S1** SEM and TEM images of CHC-T, (a, e) CHC-700, (b, f) CHC-1100, (c, g) CHC-1300 and (d, h) CHC-1500.

# Supporting Information

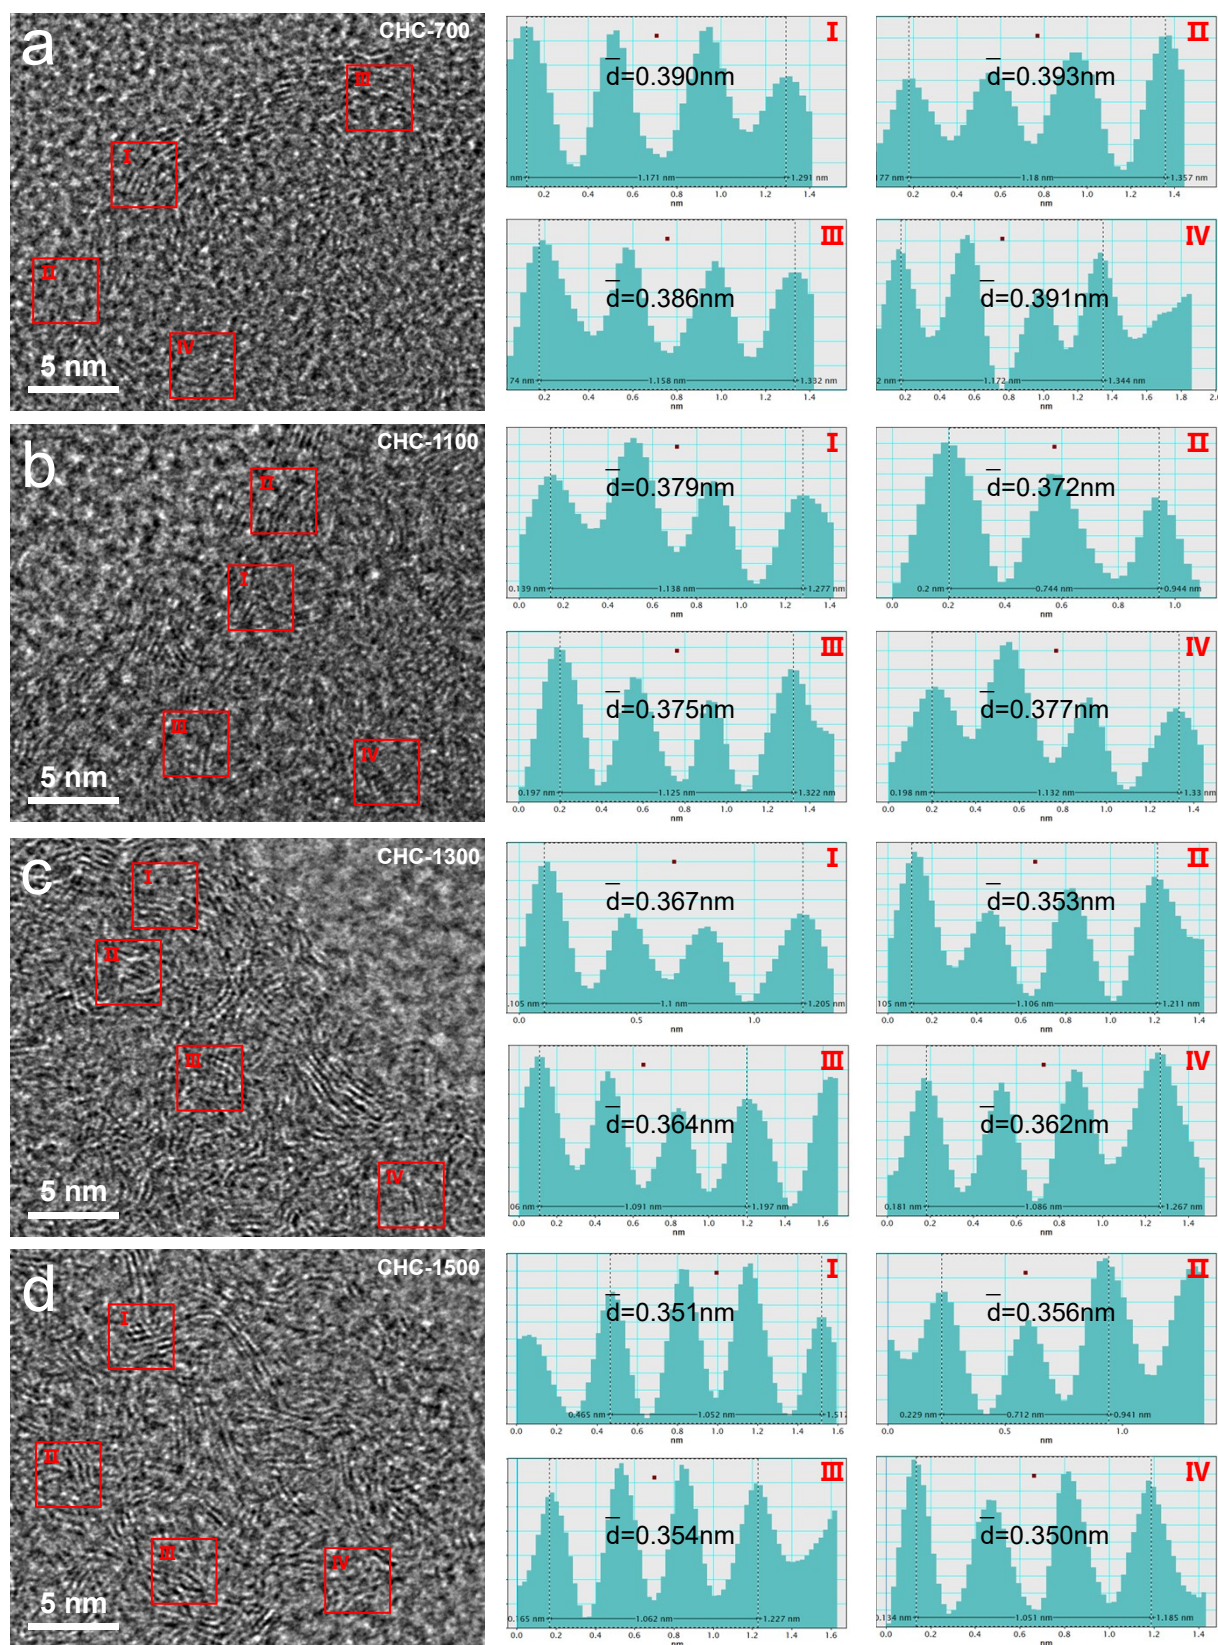

**Fig. S2** Interlayer distance of CHC-T, (a) CHC-700, (b) CHC-1100, (c) CHC-1300 and (d) CHC-1500.

# Supporting Information

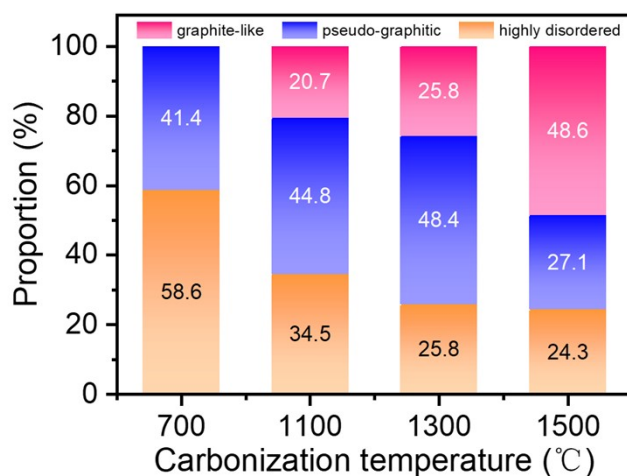

**Fig. S3** The proportion of highly disordered domains, pseudo-graphitic domains and graphite-like domains for CHC-T.

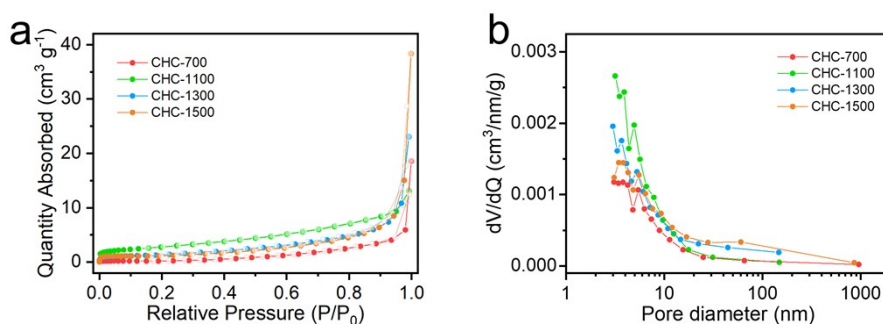

**Fig. S4** (a) N<sub>2</sub> adsorption–desorption isotherms, (b) pore size distribution curves.

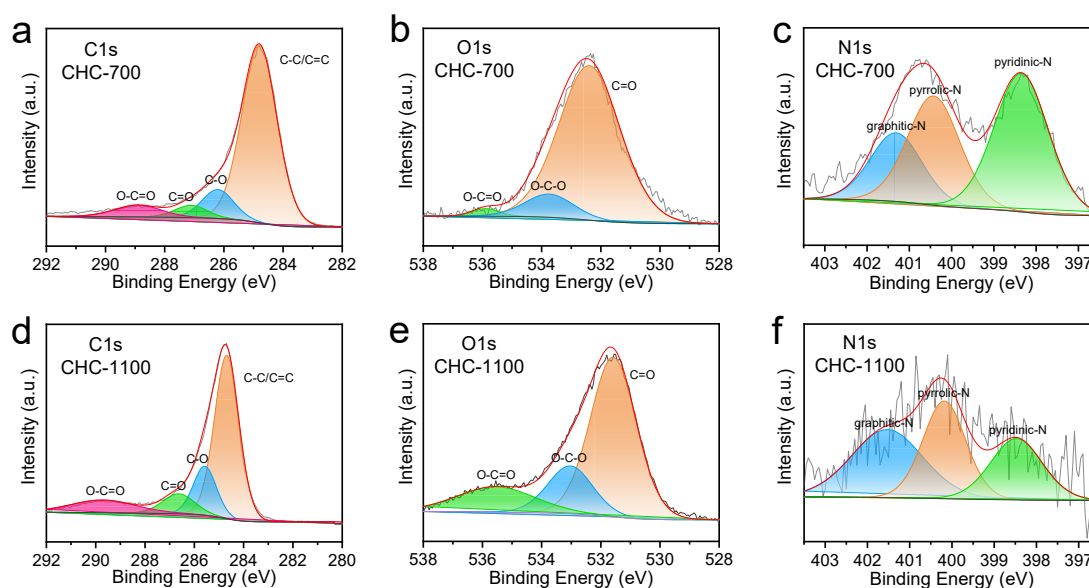

**Fig. S5** High-resolution C 1s, O 1s and N 1s XPS spectra of (a-c) CHC-700 and (d-f) CHC-1100.

# Supporting Information

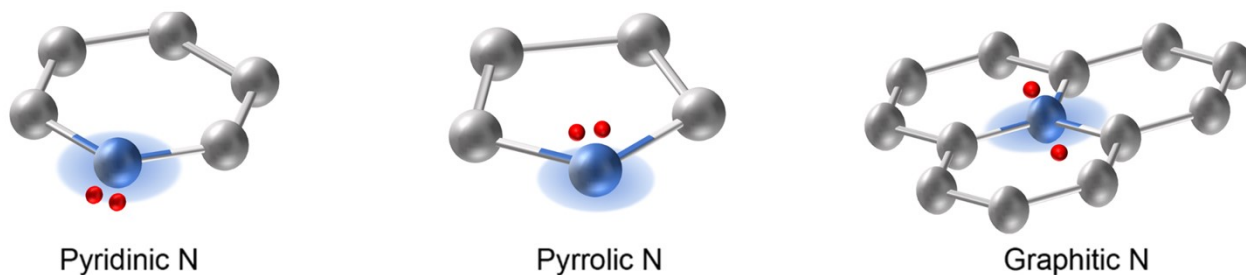

**Fig. S6** Electron configurations for pyridinic N, pyrrolic N, and graphitic N.

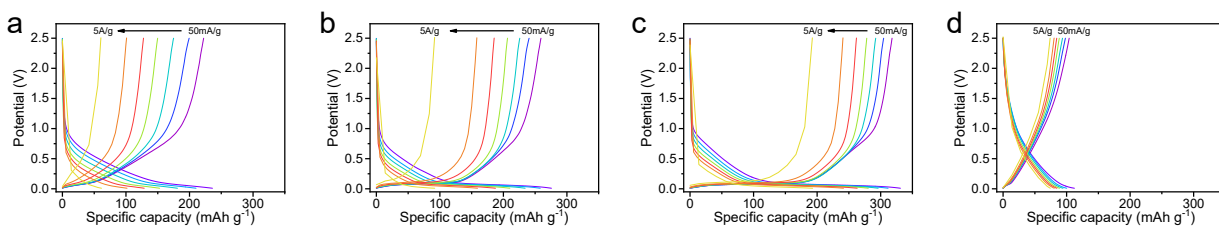

**Fig. S7** Rate performance images of (a) CHC-700, (b) CHC-1100, (c) CHC-1300 and (d) CHC-1500.

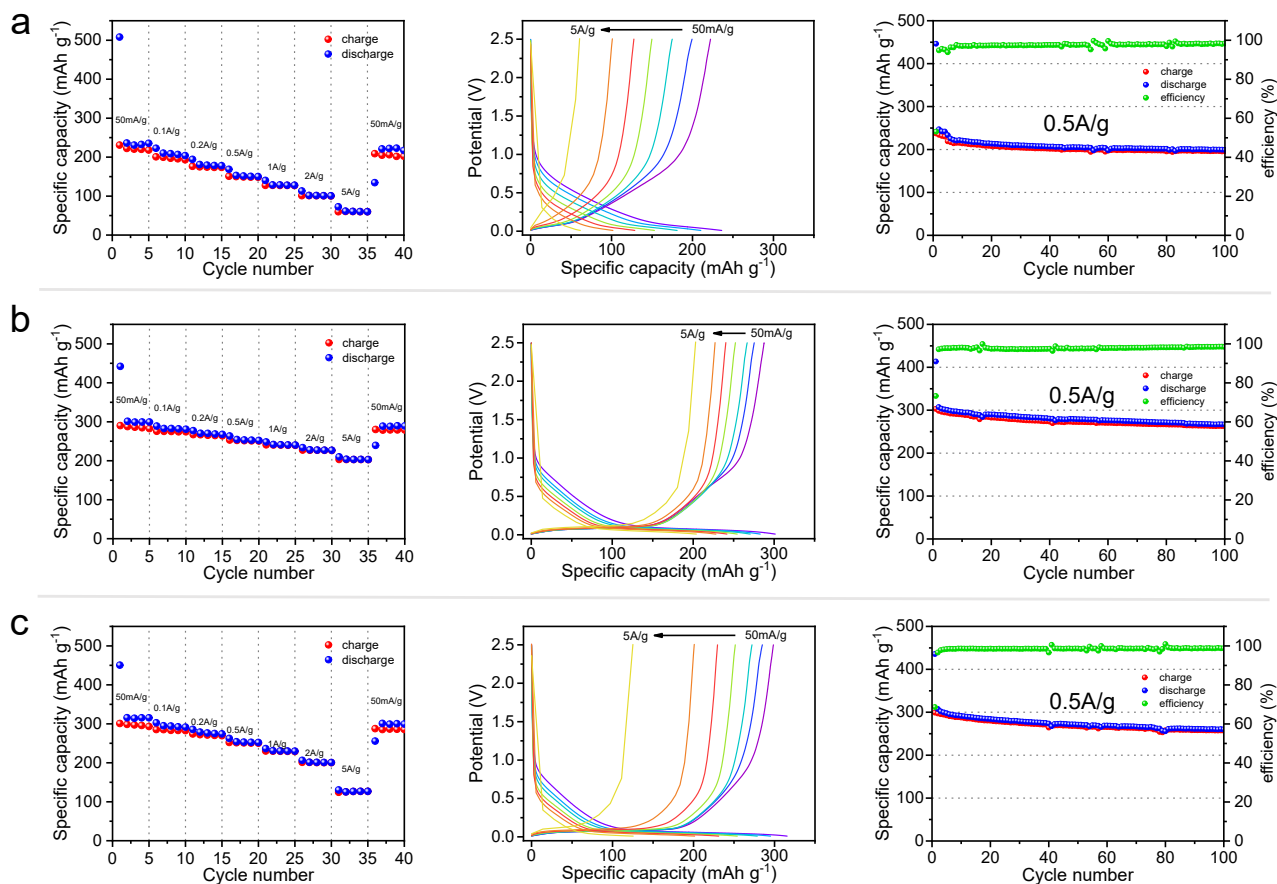

**Fig. S8** Electrochemical performance images of (a) CHC-900, (b) CHC-1200 and (c) CHC-1400.

## Supporting Information

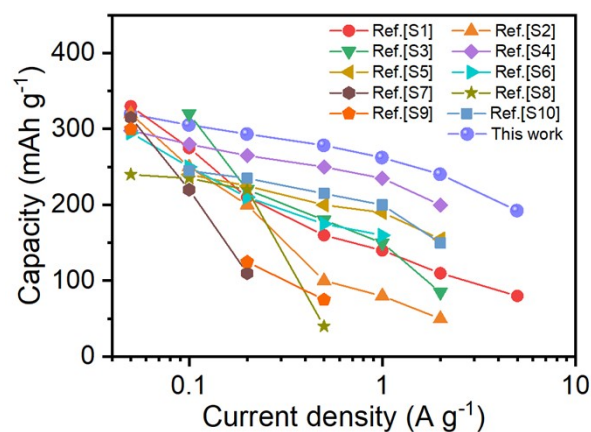

**Fig. S9** Comparison of rate capability between CHC-1300 and ever reported carbon anode materials in literatures.

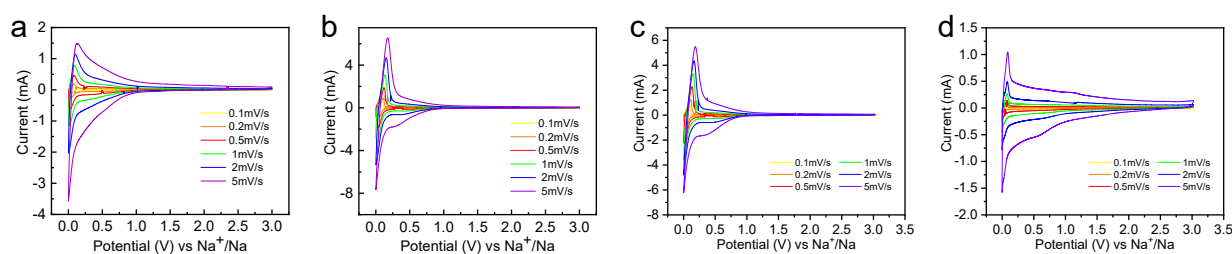

**Fig. S10** CV curves at different scan rates, (a) CHC-700, (b) CHC-1100, (c) CHC-1300 and (d) CHC-1500.

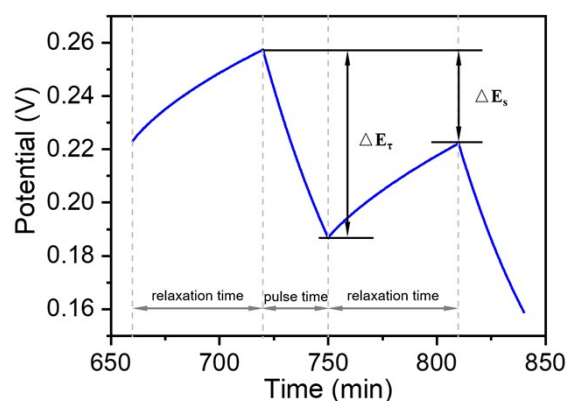

**Fig. S11**  $E$  vs.  $t$  profile for one GITT test.  $D_{\text{Na}^+}$  was predicted by the following equation:

$$D = \frac{4}{\pi\tau} \left( \frac{n_m V_m}{S} \right)^2 \left( \frac{\Delta E_s}{\Delta E_\tau} \right)^2$$

Where  $n_m$  is the amount of active substance of electrode material,  $V_m$  is the molar volume, and  $S$  represents geometric area.  $\Delta E_s$  and  $\Delta E_\tau$  can be obtained from the GITT curves.

## Supporting Information

**Table S1.** Physical parameters of CHC-T from XRD

| Sample   | $2\theta$ (°) | $\bar{d}_{(002)}$ (nm) | $L_a$ (nm) | $L_c$ (nm) |
|----------|---------------|------------------------|------------|------------|
| CHC-700  | 22.9          | 0.388                  | 1.86       | 1.03       |
| CHC-1100 | 23.6          | 0.376                  | 2.33       | 1.09       |
| CHC-1300 | 24.3          | 0.365                  | 2.84       | 1.14       |
| CHC-1500 | 25.1          | 0.355                  | 3.02       | 1.21       |

**Table S2.** Specific surface area and pore diameter of CHC-T from BET

| Sample   | $S_{BET}$ (m <sup>2</sup> g <sup>-1</sup> ) | $\bar{d}_{pore}$ (nm) |
|----------|---------------------------------------------|-----------------------|
| CHC-700  | 0.928                                       | 3.08                  |
| CHC-1100 | 9.068                                       | 3.17                  |
| CHC-1300 | 4.729                                       | 3.00                  |
| CHC-1500 | 4.490                                       | 3.44                  |

### References

- 1 N. Sun, Z. Guan, Y. Liu, Y. Cao, Q. Zhu, H. Liu, Z. Wang, P. Zhang and B. Xu, Extended “Adsorption–Insertion” Model: A New Insight into the Sodium Storage Mechanism of Hard Carbons, *Adv. Energy Mater.*, 2019, **9**, 1901351.
- 2 S. Alvin, C. Chandra and J. Kim, Controlling intercalation sites of hard carbon for enhancing Na and K storage performance, *Chem. Eng. J.*, 2021, **411**, 128490.
- 3 D. Cheng, X. Zhou, H. Hu, Z. Li, J. Chen, L. Miao, X. Ye and H. Zhang, Electrochemical storage mechanism of sodium in carbon materials: A study from soft carbon to hard carbon, *Carbon N. Y.*, 2021, **182**, 758–769.
- 4 R. Guo, C. Lv, W. Xu, J. Sun, Y. Zhu, X. Yang, J. Li, J. Sun, L. Zhang and D. Yang, Effect of

## Supporting Information

- Intrinsic Defects of Carbon Materials on the Sodium Storage Performance, *Adv. Energy Mater.*, 2020, **10**, 1903652.
- 5 C. Xu, W. Yang, G. Ma, S. Che, Y. Li, Y. Jia, N. Chen, G. Huang and Y. Li, Edge-Nitrogen Enriched Porous Carbon Nanosheets Anodes with Enlarged Interlayer Distance for Fast Charging Sodium-Ion Batteries, *Small*, 2022, **18**, 2204375.
- 6 F. Sun, H. Wang, Z. Qu, K. Wang, L. Wang, J. Gao, J. Gao, S. Liu and Y. Lu, Carboxyl-Dominant Oxygen Rich Carbon for Improved Sodium Ion Storage: Synergistic Enhancement of Adsorption and Intercalation Mechanisms, *Adv. Energy Mater.*, 2021, **11**, 2002981.
- 7 B. X. Ran Xu, Ning Sun, Huanyu Zhou, Xiaqing Chang, Razium A. Soomro, Hard carbon anodes derived from phenolic resin/sucrose cross - linking network for high-performance sodium - ion batteries, *Batter. Energy*, 2022, **2**, 20220054.
- 8 X. Liu, X. Jiang, Z. Zeng, X. Ai, H. Yang, F. Zhong, Y. Xia and Y. Cao, High Capacity and Cycle-Stable Hard Carbon Anode for Non flammable Sodium-Ion Batteries, *ACS Appl. Mater. Interfaces*, 2018, **10**, 38141–38150.
- 9 X. Zhang, X. Dong, X. Qiu, Y. Cao, C. Wang, Y. Wang and Y. Xia, Extended low-voltage plateau capacity of hard carbon spheres anode for sodium ion batteries, *J. Power Sources*, 2020, **476**, 228550.
- 10 Y. W. Yu Liu, Haodong Dai, Yongkang An, Lijun Fu, Qinyou An, A Facile and Scalable Synthesis of Sulfur, Selenium and Nitrogen co-doped Hard Carbon Anode for High Performance Na- and K-ion Batteries, *J. Mater. Chem. A*, 2020, **8**, 14993–15001.
